# Supplementary material for: Survey of the Intermolecular Disulfide Bonds Observed in Protein Crystal Structures Deposited in the Protein Data Bank
Source: MDPI journal article supplement (doi:10.3390/life12070986), 2022-06-30
Supplement: s1 [file s1]

# Survey of the intermolecular disulfide bonds observed in protein crystal structures deposited in the Protein Data Bank

Oliviero Carugo

*Department of Chemistry, University of Pavia, Italy*

*Department of Structural and Computational Biology, University of Vienna, Austria (0000-0002-2924-9016)*

## Correspondence to:

Oliviero Carugo

Department of Chemistry

University of Pavia

viale Taramelli 12

I-27100 Pavia

Italy

oliviero.carugo@univie.ac.at

## Comparison between disulfide bonds found from the atomic coordinates and from the SSBOND lines of the PDB files.

The presence of disulfide bonds was detected with two strategies, *FIND* and *GREP*.

On the one hand (*FIND* method), disulfide bonds are detected from the atomic coordinates, under the condition that the S-S covalent bond length is in the 1.9–2.1 Å range (in the case of conformational disorder, only the first conformation is considered).

On the other hand (*GREP* method), the disulfide bonds listed in the “SSBOND” lines of the PDB-formatted files are considered.

Minor differences between the results provided by the two methods are observed in 5.1% of the PDB files (from 4.8% to 5.6% amongst the 14 sets of PDB structures).

Here, a couple of examples of these discrepancies are given.

In 1fgb (cholera toxin B subunit pentamer at 2.40 Å resolution; reference A), there are five disulfide bonds, one in each protomer, between cysteines 9 and 86 (*GREP* method). However, one of them is

not detected from the analysis of the atomic coordinates since it is too long (2.14 Å; chain E), outside of the 1.9–2.1 Å range (*FIND* method).

In 1zr0 (bovine trypsin complexed by tissue factor pathway inhibitor 2 at 1.80 Å resolution; reference B), there are 17 disulfide bonds, six in chain A and in chain C (trypsin), and three in chain C and in chain D (inhibitor) (*GREP* method). However, several of them are longer than 2.1 Å—one is even 2.80 Å long—and are thus outside of the 1.9–2.1 Å range (*FIND* method).

The number of disulfide bonds found with the *FIND* methods is never larger than the number of disulfide bonds found with the *GREP* method.

A.

JRNL AUTH R.G.ZHANG,M.L.WESTBROOK,E.M.WESTBROOK,D.L.SCOTT,  
JRNL AUTH 2 Z.OTWINOWSKI,P.R.MAULIK,R.A.REED,G.G.SHIPLEY  
JRNL TITL THE 2.4 Å CRYSTAL STRUCTURE OF CHOLERA TOXIN B SUBUNIT  
JRNL TITL 2 PENTAMER: CHOLERAGENOID.  
JRNL REF J.MOL.BIOL. V. 251 550 1995

B.

JRNL AUTH A.E.SCHMIDT,H.S.CHAND,D.CASCIO,W.KISIEL,S.P.BAJAJ  
JRNL TITL CRYSTAL STRUCTURE OF KUNITZ DOMAIN 1 (KD1) OF  
JRNL TITL 2 TISSUE FACTOR PATHWAY INHIBITOR-2 IN COMPLEX WITH  
JRNL TITL 3 TRYPSIN. IMPLICATIONS FOR KD1 SPECIFICITY OF  
JRNL TITL 4 INHIBITION  
JRNL REF J.BIOL.CHEM. V. 280 27832 2005

**Table S1.** Number of intramolecular (intra) and intermolecular (inter) disulfide bonds found by the FIND and the GREP methods in the 14 subsets of the Protein Data Bank. The percentages are computed as  $100 \times \text{inter}/(\text{intra} + \text{inter})$ .

| Set | FIND  |       |      | GREP  |       |      |
|-----|-------|-------|------|-------|-------|------|
|     | intra | inter | %    | intra | inter | %    |
| 1   | 6656  | 283   | 4.08 | 7328  | 351   | 4.57 |
| 2   | 6660  | 307   | 4.41 | 7330  | 352   | 4.58 |
| 3   | 7006  | 306   | 4.18 | 7736  | 363   | 4.48 |
| 4   | 6844  | 409   | 5.64 | 7617  | 451   | 5.59 |
| 5   | 6749  | 335   | 4.73 | 7455  | 380   | 4.85 |
| 6   | 6846  | 260   | 3.66 | 7541  | 324   | 4.12 |
| 7   | 6851  | 341   | 4.74 | 7599  | 392   | 4.91 |
| 8   | 7016  | 323   | 4.40 | 7688  | 376   | 4.66 |
| 9   | 6779  | 320   | 4.51 | 7467  | 375   | 4.78 |
| 10  | 6332  | 290   | 4.38 | 6988  | 348   | 4.74 |
| 11  | 6658  | 289   | 4.16 | 7219  | 334   | 4.42 |
| 12  | 6564  | 315   | 4.58 | 7161  | 366   | 4.86 |
| 13  | 6670  | 359   | 5.11 | 7353  | 424   | 5.45 |
| 14  | 6641  | 323   | 4.64 | 7294  | 379   | 4.94 |

**Table S2.** Percentages of homomeric and heteromeric intermolecular disulfide bonds found by the FIND and GREP methods in the 14 subsets of the Protein Data Bank. A homomeric disulfide bond connects two proteins that have the same amino acidic sequence; a heteromeric disulfide bond connects two proteins that have different amino acidic sequences.

| Set | FIND      |             | GREP      |             |
|-----|-----------|-------------|-----------|-------------|
|     | homomeric | heteromeric | homomeric | heteromeric |
| 1   | 32.5      | 67.5        | 41.1      | 58.9        |
| 2   | 27.5      | 72.5        | 34.5      | 65.5        |
| 3   | 35.5      | 64.5        | 40.5      | 59.5        |
| 4   | 34.0      | 66.0        | 38.2      | 61.8        |
| 5   | 28.3      | 71.7        | 34.3      | 65.7        |
| 6   | 30.7      | 69.3        | 39.5      | 60.5        |
| 7   | 40.8      | 59.2        | 44.4      | 55.6        |
| 8   | 33.3      | 66.7        | 39.3      | 60.7        |
| 9   | 25.9      | 74.1        | 31.6      | 68.4        |
| 10  | 32.5      | 67.5        | 39.4      | 60.6        |
| 11  | 34.3      | 65.7        | 41.7      | 58.3        |
| 12  | 34.3      | 65.7        | 40.4      | 59.6        |
| 13  | 23.8      | 76.2        | 32.6      | 67.4        |
| 14  | 33.9      | 66.1        | 43.8      | 56.2        |

**Table S3.** Percentages of observations of the numbers of intermolecular DBs (NSS) between two identical or different protein chains (DBs are detected by the FIND or the GREP method) in the 14 subsets of the Protein Data Bank.

|       |           |           |           |           |
|-------|-----------|-----------|-----------|-----------|
| Set 1 |           |           |           |           |
|       | FIND      |           | GREP      |           |
| NSS   | identical | different | identical | different |
| 1     | 68.9      | 84.4      | 78.0      | 82.2      |
| 2     | 25.7      | 15.0      | 18.6      | 17.2      |
| 3     | 5.4       | 0.6       | 3.4       | 0.6       |
| Set 2 |           |           |           |           |
|       | FIND      |           | GREP      |           |
| NSS   | identical | different | identical | different |
| 1     | 82.6      | 75.8      | 85.0      | 75.3      |
| 2     | 17.4      | 24.2      | 15.0      | 24.7      |
| 3     | 0.0       | 0.0       | 0.0       | 0.0       |
| Set 3 |           |           |           |           |
|       | FIND      |           | GREP      |           |
| NSS   | identical | different | identical | different |
| 1     | 82.6      | 83.8      | 82.9      | 81.2      |
| 2     | 17.4      | 14.4      | 17.1      | 17.1      |
| 3     | 0.0       | 1.8       | 0.0       | 1.7       |
| Set 4 |           |           |           |           |
|       | FIND      |           | GREP      |           |
| NSS   | identical | different | identical | different |
| 1     | 88.3      | 67.4      | 89.2      | 68.0      |
| 2     | 10.8      | 32.6      | 10.1      | 32.0      |
| 3     | 0.9       | 0.0       | 0.7       | 0.0       |
| Set 5 |           |           |           |           |
|       | FIND      |           | GREP      |           |
| NSS   | identical | different | identical | different |
| 1     | 85.5      | 72.6      | 86.8      | 72.4      |
| 2     | 14.5      | 26.9      | 13.2      | 27.1      |
| 3     | 0.0       | 0.5       | 0.0       | 0.5       |
| Set 6 |           |           |           |           |
|       | FIND      |           | GREP      |           |
| NSS   | identical | different | identical | different |
| 1     | 87.1      | 85.4      | 87.6      | 86.1      |
| 2     | 12.9      | 14.6      | 12.4      | 13.9      |
| 3     | 0.0       | 0.0       | 0.0       | 0.0       |
| Set 7 |           |           |           |           |
|       | FIND      |           | GREP      |           |
| NSS   | identical | different | identical | different |
| 1     | 89.0      | 77.2      | 88.4      | 76.1      |
| 2     | 11.0      | 22.8      | 11.6      | 23.9      |
| 3     | 0.0       | 0.0       | 0.0       | 0.0       |
| Set 8 |           |           |           |           |
|       | FIND      |           | GREP      |           |
| NSS   | identical | different | identical | different |
| 1     | 86.5      | 76.4      | 87.8      | 75.8      |

|        |           |           |           |           |
|--------|-----------|-----------|-----------|-----------|
| 2      | 13.5      | 23.0      | 12.2      | 23.7      |
| 3      | 0.0       | 0.6       | 0.0       | 0.5       |
| Set 9  |           |           |           |           |
|        | FIND      |           | GREP      |           |
| NSS    | identical | different | identical | different |
| 1      | 85.9      | 83.7      | 86.1      | 83.1      |
| 2      | 14.1      | 14.8      | 12.9      | 15.5      |
| 3      | 0.0       | 1.5       | 1.0       | 1.4       |
| Set 10 |           |           |           |           |
|        | FIND      |           | GREP      |           |
| NSS    | identical | different | identical | different |
| 1      | 85.9      | 77.8      | 86.7      | 75.9      |
| 2      | 14.1      | 20.4      | 12.4      | 22.4      |
| 3      | 0.0       | 1.8       | 0.9       | 1.7       |
| Set 11 |           |           |           |           |
|        | FIND      |           | GREP      |           |
| NSS    | identical | different | identical | different |
| 1      | 86.7      | 78.6      | 89.8      | 78.2      |
| 2      | 13.3      | 20.1      | 9.3       | 20.6      |
| 3      | 0.0       | 1.3       | 0.8       | 1.2       |
| Set 12 |           |           |           |           |
|        | FIND      |           | GREP      |           |
| NSS    | identical | different | identical | different |
| 1      | 81.3      | 81.0      | 84.9      | 81.2      |
| 2      | 18.7      | 19.0      | 15.1      | 18.8      |
| 3      | 0.0       | 0.0       | 0.0       | 0.0       |
| Set 13 |           |           |           |           |
|        | FIND      |           | GREP      |           |
| NSS    | identical | different | identical | different |
| 1      | 82.1      | 70.1      | 87.2      | 67.1      |
| 2      | 14.9      | 29.9      | 11.0      | 32.9      |
| 3      | 3.0       | 0.0       | 1.8       | 0.0       |
| Set 14 |           |           |           |           |
|        | FIND      |           | GREP      |           |
| NSS    | identical | different | identical | different |
| 1      | 82.4      | 67.5      | 87.2      | 67.8      |
| 2      | 17.6      | 31.9      | 12.8      | 31.6      |
| 3      | 0.0       | 0.6       | 0.0       | 0.6       |

**Table S4.** Percentages of secondary structures (ss) of the cysteines that form intra- or intermolecular DBs in the 14 subsets of the Protein Data Bank. Secondary structure assignments were performed with DSSP or Stride. DBs were identified with the FIND or the GREP methods. Only data with percentages of observations larger than 5% (in any combination DSSP/Stride or FIND/GREP) are shown.

| Set 1 |       |       |       |       |        |       |       |       |
|-------|-------|-------|-------|-------|--------|-------|-------|-------|
|       | DSSP  |       |       |       | Stride |       |       |       |
|       | FIND  |       | GREP  |       | FIND   |       | GREP  |       |
| ss    | Intra | Inter | Intra | Inter | Intra  | Inter | Intra | inter |
| HH    | 4.2   | 13.5  | 5.6   | 11.7  | 4.4    | 15.7  | 3.1   | 7.4   |
| HE    | 6.2   | 0.0   | 6.2   | 0.0   | 6.2    | 0.0   | 11.8  | 0.0   |
| EE    | 22.8  | 16.7  | 23.2  | 16.7  | 22.2   | 16.0  | 17.5  | 3.7   |
| CE    | 0.0   | 0.0   | 7.8   | 1.4   | 0.0    | 0.0   | 8.1   | 0.0   |
| TH    | 1.8   | 0.0   | 3.7   | 1.1   | 1.9    | 0.0   | 4.3   | 0.0   |
| TE    | 1.8   | 0.0   | 6.0   | 0.0   | 1.7    | 0.0   | 4.9   | 0.0   |
| TT    | 0.3   | 1.1   | 5.6   | 5.0   | 0.4    | 2.0   | 8.8   | 3.7   |
| Set 2 |       |       |       |       |        |       |       |       |
|       | DSSP  |       |       |       | Stride |       |       |       |
|       | FIND  |       | GREP  |       | FIND   |       | GREP  |       |
| ss    | Intra | Inter | Intra | Inter | Intra  | Inter | Intra | inter |
| HH    | 5.4   | 8.1   | 7.3   | 14.0  | 5.3    | 10.5  | 7.9   | 14.4  |
| HE    | 4.9   | 0.0   | 4.9   | 0.0   | 5.1    | 0.0   | 5.6   | 0.0   |
| EE    | 22.9  | 19.2  | 23.5  | 18.2  | 22.3   | 18.5  | 21.2  | 11.5  |
| CE    | 0.0   | 0.0   | 5.4   | 0.7   | 0.0    | 0.0   | 5.6   | 0.8   |
| TH    | 2.0   | 3.6   | 3.9   | 0.7   | 1.9    | 3.7   | 3.9   | 1.2   |
| TE    | 2.2   | 0.3   | 6.5   | 0.3   | 2.0    | 0.3   | 6.0   | 0.0   |
| TT    | 0.3   | 2.0   | 5.8   | 4.6   | 0.3    | 2.0   | 6.2   | 6.6   |
| Set 3 |       |       |       |       |        |       |       |       |
|       | DSSP  |       |       |       | Stride |       |       |       |
|       | FIND  |       | GREP  |       | FIND   |       | GREP  |       |
| ss    | Intra | Inter | Intra | Inter | Intra  | Inter | Intra | inter |
| HH    | 4.4   | 9.2   | 6.2   | 11.5  | 4.4    | 10.2  | 12.4  | 2.0   |
| HE    | 4.7   | 0.3   | 4.6   | 0.0   | 4.6    | 0.3   | 7.2   | 0.0   |
| EE    | 23.8  | 19.3  | 24.2  | 18.0  | 23.3   | 18.8  | 13.6  | 9.8   |
| CE    | 0.0   | 0.0   | 6.6   | 2.0   | 0.0    | 0.0   | 5.6   | 2.0   |
| TH    | 1.7   | 1.6   | 3.7   | 2.3   | 1.8    | 2.2   | 6.0   | 0.0   |
| TE    | 2.0   | 0.3   | 6.1   | 0.3   | 2.0    | 0.3   | 2.9   | 0.0   |
| TT    | 0.5   | 1.6   | 6.2   | 5.6   | 0.5    | 1.4   | 6.4   | 5.9   |
| Set 4 |       |       |       |       |        |       |       |       |
|       | DSSP  |       |       |       | Stride |       |       |       |
|       | FIND  |       | GREP  |       | FIND   |       | GREP  |       |
| ss    | Intra | Inter | Intra | Inter | Intra  | Inter | Intra | inter |
| HH    | 4.9   | 12.2  | 6.0   | 17.3  | 4.7    | 12.2  | 6.9   | 0.0   |
| HE    | 5.9   | 0.0   | 5.8   | 0.0   | 6.0    | 0.0   | 7.1   | 0.0   |
| EE    | 20.9  | 15.6  | 21.6  | 15.1  | 20.7   | 15.9  | 17.4  | 16.7  |
| CE    | 0.0   | 0.0   | 6.9   | 1.2   | 0.0    | 0.0   | 5.5   | 0.0   |
| TH    | 1.7   | 4.4   | 3.6   | 1.0   | 1.6    | 4.2   | 6.4   | 4.2   |
| TE    | 2.0   | 1.0   | 6.1   | 1.0   | 2.0    | 0.9   | 4.9   | 0.0   |
| TT    | 0.3   | 1.7   | 6.8   | 2.9   | 0.4    | 1.5   | 5.9   | 0.0   |

|       |       |       |       |       |        |       |       |       |
|-------|-------|-------|-------|-------|--------|-------|-------|-------|
| Set 5 |       |       |       |       |        |       |       |       |
|       | DSSP  |       |       |       | Stride |       |       |       |
|       | FIND  |       | GREP  |       | FIND   |       | GREP  |       |
| ss    | Intra | Inter | Intra | Inter | Intra  | Inter | Intra | inter |
| HH    | 3.8   | 7.2   | 5.3   | 15.9  | 4.0    | 8.4   | 5.8   | 13.2  |
| HE    | 4.4   | 0.0   | 4.3   | 0.0   | 4.6    | 0.0   | 6.0   | 0.0   |
| EE    | 22.4  | 18.0  | 22.9  | 18.0  | 22.2   | 17.4  | 18.4  | 9.2   |
| CE    | 0.0   | 0.0   | 6.1   | 0.9   | 0.0    | 0.0   | 5.8   | 1.3   |
| TH    | 1.9   | 5.7   | 4.2   | 0.3   | 1.9    | 5.3   | 5.0   | 1.3   |
| TE    | 1.8   | 0.0   | 5.9   | 0.9   | 1.7    | 0.0   | 6.6   | 0.0   |
| TT    | 0.3   | 1.5   | 6.3   | 4.2   | 0.3    | 2.4   | 7.6   | 1.3   |
| Set 6 |       |       |       |       |        |       |       |       |
|       | DSSP  |       |       |       | Stride |       |       |       |
|       | FIND  |       | GREP  |       | FIND   |       | GREP  |       |
| ss    | Intra | Inter | Intra | Inter | Intra  | Inter | Intra | inter |
| HH    | 4.7   | 6.2   | 6.2   | 11.2  | 4.7    | 9.9   | 7.0   | 15.5  |
| HE    | 4.5   | 0.0   | 4.4   | 0.0   | 4.5    | 0.0   | 5.9   | 0.0   |
| EE    | 22.5  | 15.8  | 23.1  | 15.0  | 22.5   | 16.0  | 19.1  | 9.0   |
| CE    | 0.0   | 0.0   | 5.8   | 2.7   | 0.0    | 0.0   | 5.3   | 3.9   |
| TH    | 2.0   | 2.7   | 3.7   | 0.0   | 2.0    | 2.2   | 4.1   | 0.0   |
| TE    | 2.0   | 0.0   | 5.9   | 1.9   | 1.9    | 0.0   | 5.8   | 0.0   |
| TT    | 0.5   | 2.3   | 6.1   | 3.8   | 0.4    | 2.2   | 7.4   | 3.2   |
| Set 7 |       |       |       |       |        |       |       |       |
|       | DSSP  |       |       |       | Stride |       |       |       |
|       | FIND  |       | GREP  |       | FIND   |       | GREP  |       |
| ss    | Intra | Inter | Intra | Inter | Intra  | Inter | Intra | inter |
| HH    | 5.1   | 6.2   | 6.9   | 9.7   | 5.2    | 7.1   | 7.7   | 0.0   |
| HE    | 5.1   | 0.0   | 4.9   | 0.0   | 4.9    | 0.0   | 7.7   | 0.0   |
| EE    | 21.4  | 12.3  | 21.9  | 12.0  | 21.2   | 13.5  | 16.3  | 4.7   |
| CE    | 0.0   | 0.0   | 5.9   | 1.2   | 0.0    | 0.0   | 5.3   | 0.0   |
| TH    | 2.1   | 1.8   | 4.3   | 1.5   | 2.1    | 1.5   | 6.0   | 4.7   |
| TE    | 2.2   | 0.0   | 6.1   | 0.0   | 2.0    | 0.0   | 4.0   | 0.0   |
| TT    | 0.5   | 5.6   | 6.9   | 9.7   | 0.5    | 5.1   | 7.1   | 11.6  |
| Set 8 |       |       |       |       |        |       |       |       |
|       | DSSP  |       |       |       | Stride |       |       |       |
|       | FIND  |       | GREP  |       | FIND   |       | GREP  |       |
| ss    | Intra | Inter | Intra | Inter | Intra  | Inter | Intra | inter |
| HH    | 4.6   | 10.2  | 6.6   | 13.0  | 4.6    | 11.5  | 11.1  | 9.8   |
| HE    | 5.0   | 1.2   | 4.9   | 1.2   | 5.0    | 1.1   | 6.1   | 9.8   |
| EE    | 23.3  | 13.0  | 23.7  | 12.7  | 23.1   | 13.3  | 14.4  | 2.4   |
| CE    | 0.0   | 0.0   | 6.7   | 0.9   | 0.0    | 0.0   | 5.5   | 2.4   |
| TH    | 2.2   | 1.6   | 4.2   | 0.9   | 2.2    | 1.9   | 6.3   | 0.0   |
| TE    | 2.0   | 0.0   | 6.3   | 0.9   | 2.0    | 0.0   | 5.3   | 0.0   |
| TT    | 0.5   | 3.1   | 5.9   | 6.5   | 0.5    | 2.9   | 5.2   | 12.2  |
| Set 9 |       |       |       |       |        |       |       |       |
|       | DSSP  |       |       |       | Stride |       |       |       |
|       | FIND  |       | GREP  |       | FIND   |       | GREP  |       |
| ss    | Intra | Inter | Intra | Inter | Intra  | Inter | Intra | inter |
| HH    | 3.4   | 9.4   | 5.3   | 14.1  | 3.6    | 9.9   | 7.3   | 0.0   |
| HE    | 4.9   | 1.2   | 4.7   | 1.2   | 4.7    | 1.1   | 5.3   | 12.9  |

|        |       |       |       |       |        |       |       |       |
|--------|-------|-------|-------|-------|--------|-------|-------|-------|
| EE     | 23.6  | 17.5  | 24.5  | 17.5  | 23.4   | 17.6  | 18.7  | 9.7   |
| CE     | 0.0   | 0.0   | 5.2   | 1.2   | 0.0    | 0.0   | 3.6   | 3.2   |
| TH     | 2.3   | 2.5   | 4.4   | 0.6   | 2.1    | 2.1   | 7.7   | 0.0   |
| TE     | 1.8   | 0.3   | 6.4   | 0.6   | 1.8    | 0.5   | 4.7   | 0.0   |
| TT     | 0.4   | 1.9   | 6.4   | 6.9   | 0.3    | 1.9   | 7.9   | 9.7   |
| Set 10 |       |       |       |       |        |       |       |       |
|        | DSSP  |       |       |       | Stride |       |       |       |
|        | FIND  |       | GREP  |       | FIND   |       | GREP  |       |
| ss     | Intra | Inter | Intra | Inter | Intra  | Inter | Intra | inter |
| HH     | 4.3   | 12.4  | 6.2   | 15.5  | 4.5    | 14.1  | 8.4   | 10.0  |
| HE     | 4.7   | 0.0   | 4.7   | 0.0   | 4.7    | 0.0   | 8.5   | 0.0   |
| EE     | 24.2  | 15.2  | 24.7  | 15.2  | 23.8   | 14.4  | 19.0  | 10.0  |
| CE     | 0.0   | 0.0   | 6.1   | 1.7   | 0.0    | 0.0   | 3.0   | 0.0   |
| TH     | 2.0   | 1.4   | 3.9   | 1.0   | 2.0    | 2.3   | 4.9   | 0.0   |
| TE     | 2.1   | 0.3   | 5.1   | 0.3   | 1.9    | 0.3   | 5.0   | 0.0   |
| TT     | 0.7   | 2.8   | 6.3   | 3.8   | 0.7    | 2.6   | 6.2   | 6.7   |
| Set 11 |       |       |       |       |        |       |       |       |
|        | DSSP  |       |       |       | Stride |       |       |       |
|        | FIND  |       | GREP  |       | FIND   |       | GREP  |       |
| ss     | Intra | Inter | Intra | Inter | Intra  | Inter | Intra | inter |
| HH     | 3.4   | 12.1  | 4.7   | 15.9  | 3.7    | 13.2  | 3.3   | 22.6  |
| HE     | 6.2   | 0.0   | 6.0   | 0.0   | 5.9    | 0.0   | 10.6  | 0.0   |
| EE     | 22.8  | 14.5  | 23.5  | 13.8  | 22.6   | 15.3  | 18.2  | 0.0   |
| CE     | 0.0   | 0.0   | 5.9   | 0.0   | 0.0    | 0.0   | 6.1   | 0.0   |
| TH     | 2.1   | 1.0   | 4.3   | 1.0   | 2.1    | 0.9   | 4.2   | 0.0   |
| TE     | 1.9   | 0.7   | 5.9   | 1.0   | 1.8    | 0.6   | 5.0   | 0.0   |
| TT     | 0.7   | 1.7   | 6.5   | 6.6   | 0.7    | 2.1   | 9.0   | 6.5   |
| Set 12 |       |       |       |       |        |       |       |       |
|        | DSSP  |       |       |       | Stride |       |       |       |
|        | FIND  |       | GREP  |       | FIND   |       | GREP  |       |
| ss     | Intra | Inter | Intra | Inter | Intra  | Inter | Intra | inter |
| HH     | 5.0   | 11.4  | 6.6   | 26.9  | 5.0    | 10.9  | 7.8   | 14.0  |
| HE     | 6.0   | 0.0   | 7.9   | 0.0   | 6.0    | 0.0   | 7.0   | 0.0   |
| EE     | 21.7  | 16.8  | 18.5  | 3.8   | 21.4   | 16.9  | 18.2  | 11.8  |
| CE     | 0.0   | 0.0   | 5.8   | 0.0   | 0.0    | 0.0   | 6.6   | 0.6   |
| TH     | 1.8   | 1.9   | 4.3   | 0.0   | 1.9    | 1.6   | 4.0   | 1.1   |
| TE     | 2.3   | 0.0   | 5.0   | 0.0   | 2.2    | 0.0   | 6.4   | 1.1   |
| TT     | 0.4   | 1.9   | 6.8   | 0.0   | 0.3    | 1.6   | 6.3   | 6.2   |
| Set 13 |       |       |       |       |        |       |       |       |
|        | DSSP  |       |       |       | Stride |       |       |       |
|        | FIND  |       | GREP  |       | FIND   |       | GREP  |       |
| ss     | Intra | Inter | Intra | Inter | Intra  | Inter | Intra | inter |
| HH     | 5.5   | 8.9   | 6.1   | 19.7  | 5.5    | 10.1  | 6.5   | 25.9  |
| HE     | 5.5   | 0.0   | 5.9   | 0.0   | 5.7    | 0.0   | 7.7   | 0.0   |
| EE     | 22.6  | 12.0  | 23.6  | 7.5   | 22.6   | 12.0  | 19.6  | 3.7   |
| CE     | 0.0   | 0.0   | 5.8   | 2.1   | 0.0    | 0.0   | 5.3   | 0.0   |
| TH     | 1.5   | 3.6   | 4.0   | 0.0   | 1.5    | 3.8   | 4.5   | 0.0   |
| TE     | 1.9   | 0.0   | 4.8   | 0.0   | 2.0    | 0.0   | 5.2   | 0.0   |
| TT     | 0.7   | 0.3   | 6.8   | 5.0   | 0.7    | 0.7   | 6.7   | 0.0   |
| Set 14 |       |       |       |       |        |       |       |       |



|    | DSSP  |       |       |       | Stride |       |       |       |
|----|-------|-------|-------|-------|--------|-------|-------|-------|
|    | FIND  |       | GREP  |       | FIND   |       | GREP  |       |
| ss | Intra | Inter | Intra | Inter | Intra  | Inter | Intra | inter |
| HH | 4.6   | 11.8  | 6.2   | 11.2  | 4.8    | 14.9  | 6.4   | 22.4  |
| HE | 5.5   | 0.0   | 4.4   | 0.0   | 5.4    | 0.0   | 5.7   | 0.0   |
| EE | 23.1  | 7.5   | 23.1  | 15.0  | 23.1   | 7.4   | 23.3  | 7.7   |
| CE | 0.0   | 0.0   | 5.8   | 2.7   | 0.0    | 0.0   | 6.0   | 1.7   |
| TH | 2.1   | 3.4   | 3.7   | 0.0   | 2.0    | 2.9   | 4.0   | 0.3   |
| TE | 2.1   | 0.0   | 5.9   | 1.9   | 2.1    | 0.0   | 5.2   | 0.0   |
| TT | 0.6   | 1.6   | 6.1   | 3.8   | 0.6    | 2.4   | 6.8   | 7.3   |

**Table S5.** Average values (standard deviations of the mean in parentheses) of the solvent accessible surface area ( $\text{\AA}^2$ ) of the cysteines forming intra- or intermolecular disulfide bonds in the 14 subsets of the Protein Data Bank. Disulfide bonds have been identified with the FIND and GRAP methods.

|        | FIND      |           | GREP      |           |
|--------|-----------|-----------|-----------|-----------|
|        | intra     | inter     | intra     | inter     |
| Set 1  | 10.7(0.1) | 21.5(0.9) | 10.9(0.1) | 25.7(1.1) |
| Set 2  | 11.2(0.2) | 22.7(1.0) | 11.3(0.1) | 25.2(1.1) |
| Set 3  | 11.5(0.2) | 25.9(1.2) | 11.7(0.1) | 28.0(1.1) |
| Set 4  | 11.9(0.2) | 20.7(0.8) | 12.0(0.1) | 23.0(0.9) |
| Set 5  | 11.7(0.2) | 26.8(1.2) | 11.7(0.1) | 30.1(1.2) |
| Set 6  | 11.6(0.1) | 28.0(1.5) | 11.7(0.1) | 30.4(1.3) |
| Set 7  | 11.7(0.1) | 25.9(1.0) | 11.7(0.1) | 27.7(1.0) |
| Set 8  | 11.4(0.1) | 29.8(1.3) | 11.4(0.1) | 32.4(1.2) |
| Set 9  | 11.1(0.1) | 25.6(1.2) | 11.1(0.1) | 29.0(1.2) |
| Set 10 | 11.4(0.2) | 22.8(1.1) | 11.4(0.1) | 25.5(1.1) |
| Set 11 | 11.5(0.2) | 23.7(1.2) | 11.5(0.1) | 26.0(1.1) |
| Set 12 | 11.5(0.2) | 23.6(1.1) | 11.7(0.1) | 26.6(1.1) |
| Set 13 | 11.8(0.2) | 20.5(0.9) | 11.9(0.1) | 24.0(0.9) |
| Set 14 | 11.9(0.2) | 25.2(1.1) | 12.0(0.1) | 27.6(1.1) |

**Table S6.** Percentages of various types of proteins (non-enzyme and the seven types of enzymes) that contain both intra- and intermolecular disulfide bonds (Both), only intramolecular disulfide bonds (Intra-only) or only intermolecular disulfide bonds (Inter-only), in the 14 subsets of the Protein Data Bank examined in the present manuscript. Disulfide bonds are identified with the FIND or with the GREP method.

| <i>Non-enzyme</i>      |      |            |            |      |            |            |
|------------------------|------|------------|------------|------|------------|------------|
| Set                    | FIND |            |            | GREP |            |            |
|                        | Both | Intra-only | Inter-only | Both | Intra-only | Inter-only |
| Set 1                  | 53.8 | 48.2       | 65.3       | 54.7 | 47.8       | 56.7       |
| Set 2                  | 55.9 | 48.0       | 62.2       | 55.5 | 47.7       | 57.9       |
| Set 3                  | 58.7 | 46.6       | 38.5       | 57.2 | 46.1       | 35.0       |
| Set 4                  | 61.2 | 46.3       | 62.0       | 60.2 | 46.5       | 50.8       |
| Set 5                  | 58.8 | 46.9       | 58.7       | 59.5 | 47.3       | 54.5       |
| Set 6                  | 56.1 | 46.1       | 53.8       | 54.5 | 46.2       | 52.4       |
| Set 7                  | 56.8 | 46.6       | 50.0       | 56.5 | 47.2       | 49.2       |
| Set 8                  | 59.7 | 47.1       | 60.8       | 60.7 | 47.0       | 58.7       |
| Set 9                  | 61.7 | 46.9       | 55.6       | 60.9 | 47.1       | 50.0       |
| Set 10                 | 61.3 | 48.6       | 47.6       | 60.3 | 48.4       | 50.8       |
| Set 11                 | 56.9 | 47.7       | 53.6       | 57.4 | 47.4       | 51.4       |
| Set 12                 | 48.1 | 49.6       | 53.8       | 46.7 | 49.4       | 52.9       |
| Set 13                 | 58.8 | 50.3       | 53.5       | 59.3 | 50.7       | 51.5       |
| Set 14                 | 54.9 | 47.0       | 43.5       | 54.1 | 46.7       | 40.8       |
| <i>Oxidoreductases</i> |      |            |            |      |            |            |
| Set                    | FIND |            |            | GREP |            |            |
|                        | Both | Intra-only | Inter-only | Both | Intra-only | Inter-only |
| Set 1                  | 1.0  | 6.5        | 8.2        | 1.7  | 7.1        | 13.4       |
| Set 2                  | 2.5  | 7.3        | 5.4        | 3.1  | 7.9        | 5.3        |
| Set 3                  | 1.7  | 6.8        | 11.5       | 1.4  | 7.8        | 13.3       |
| Set 4                  | 0.8  | 7.2        | 4.0        | 0.8  | 7.9        | 10.8       |
| Set 5                  | 1.7  | 6.8        | 10.9       | 1.5  | 7.4        | 15.2       |
| Set 6                  | 1.9  | 5.5        | 12.8       | 2.5  | 6.0        | 15.9       |
| Set 7                  | 2.4  | 6.4        | 9.6        | 2.2  | 6.6        | 16.9       |
| Set 8                  | 3.1  | 5.8        | 5.9        | 3.6  | 6.6        | 6.7        |
| Set 9                  | 1.6  | 5.7        | 11.1       | 2.0  | 6.3        | 14.3       |
| Set 10                 | 1.7  | 5.9        | 14.3       | 2.3  | 6.3        | 18.6       |
| Set 11                 | 2.0  | 5.3        | 7.1        | 2.6  | 6.3        | 12.5       |
| Set 12                 | 1.9  | 6.8        | 13.5       | 2.5  | 7.2        | 17.1       |
| Set 13                 | 0.9  | 6.2        | 11.6       | 0.8  | 7.0        | 15.2       |
| Set 14                 | 3.3  | 5.7        | 10.9       | 3.0  | 7.1        | 14.1       |
| <i>Transferases</i>    |      |            |            |      |            |            |
| Set                    | FIND |            |            | GREP |            |            |
|                        | Both | Intra-only | Inter-only | Both | Intra-only | Inter-only |
| Set 1                  | 1.0  | 2.9        | 12.2       | 1.7  | 3.3        | 11.9       |
| Set 2                  | 0.0  | 2.6        | 16.2       | 0.0  | 3.5        | 15.8       |
| Set 3                  | 0.8  | 3.5        | 13.5       | 1.4  | 3.8        | 11.7       |
| Set 4                  | 0.0  | 3.1        | 14.0       | 0.0  | 3.3        | 13.8       |

|        |     |     |      |     |     |      |
|--------|-----|-----|------|-----|-----|------|
| Set 5  | 0.0 | 4.4 | 15.2 | 0.8 | 4.8 | 12.1 |
| Set 6  | 0.9 | 3.4 | 17.9 | 2.5 | 4.1 | 11.1 |
| Set 7  | 0.0 | 3.2 | 17.3 | 2.2 | 3.5 | 10.8 |
| Set 8  | 1.6 | 3.4 | 15.7 | 1.4 | 4.0 | 18.7 |
| Set 9  | 3.1 | 3.3 | 17.8 | 4.0 | 3.6 | 14.3 |
| Set 10 | 0.8 | 4.0 | 9.5  | 0.8 | 4.8 | 10.2 |
| Set 11 | 1.0 | 3.0 | 14.3 | 1.7 | 3.2 | 15.3 |
| Set 12 | 0.0 | 3.9 | 17.3 | 1.6 | 4.7 | 15.7 |
| Set 13 | 0.9 | 4.6 | 11.6 | 0.8 | 4.9 | 13.6 |
| Set 14 | 1.6 | 3.6 | 15.2 | 1.5 | 3.8 | 16.9 |

### *Hydrolases*

| Set    | FIND |            |            | GREP |            |            |
|--------|------|------------|------------|------|------------|------------|
|        | Both | Intra-only | Inter-only | Both | Intra-only | Inter-only |
| Set 1  | 44.2 | 41.0       | 10.2       | 41.9 | 40.2       | 10.4       |
| Set 2  | 41.5 | 39.4       | 8.1        | 41.4 | 38.0       | 7.0        |
| Set 3  | 38.0 | 41.6       | 25.0       | 38.4 | 40.1       | 23.3       |
| Set 4  | 37.2 | 41.8       | 8.0        | 38.3 | 40.4       | 10.8       |
| Set 5  | 37.8 | 40.9       | 10.9       | 36.6 | 39.1       | 10.6       |
| Set 6  | 39.3 | 43.9       | 10.3       | 37.2 | 42.4       | 9.5        |
| Set 7  | 40.8 | 42.0       | 15.4       | 38.4 | 40.7       | 12.3       |
| Set 8  | 34.9 | 42.6       | 11.8       | 33.6 | 41.0       | 10.7       |
| Set 9  | 33.6 | 42.2       | 11.1       | 32.5 | 40.9       | 17.9       |
| Set 10 | 36.1 | 40.1       | 14.3       | 35.9 | 38.7       | 8.5        |
| Set 11 | 38.2 | 42.5       | 17.9       | 35.7 | 41.1       | 13.9       |
| Set 12 | 49.1 | 38.3       | 9.6        | 47.5 | 37.0       | 7.1        |
| Set 13 | 38.6 | 37.2       | 14.0       | 37.4 | 35.3       | 12.1       |
| Set 14 | 39.3 | 41.8       | 21.7       | 38.3 | 40.3       | 19.7       |

### *Lyases*

| Set    | FIND |            |            | GREP |            |            |
|--------|------|------------|------------|------|------------|------------|
|        | Both | Intra-only | Inter-only | Both | Intra-only | Inter-only |
| Set 1  | 0.0  | 0.9        | 0.0        | 0.0  | 0.9        | 3.0        |
| Set 2  | 0.0  | 1.5        | 5.4        | 0.0  | 1.5        | 8.8        |
| Set 3  | 0.8  | 0.5        | 3.8        | 0.7  | 0.7        | 6.7        |
| Set 4  | 0.8  | 1.0        | 4.0        | 0.8  | 1.2        | 4.6        |
| Set 5  | 1.7  | 0.8        | 2.2        | 1.5  | 0.9        | 3.0        |
| Set 6  | 0.9  | 0.6        | 0.0        | 1.7  | 0.8        | 1.6        |
| Set 7  | 0.0  | 1.2        | 5.8        | 0.7  | 1.2        | 6.2        |
| Set 8  | 0.8  | 0.5        | 2.0        | 0.7  | 0.5        | 1.3        |
| Set 9  | 0.0  | 1.1        | 2.2        | 0.7  | 1.1        | 0.0        |
| Set 10 | 0.0  | 0.9        | 2.4        | 0.8  | 0.9        | 1.7        |
| Set 11 | 2.0  | 1.0        | 1.8        | 2.6  | 1.1        | 1.4        |
| Set 12 | 0.9  | 1.1        | 3.8        | 1.6  | 1.2        | 2.9        |
| Set 13 | 0.9  | 1.0        | 4.7        | 1.6  | 1.1        | 3.0        |
| Set 14 | 0.8  | 1.0        | 6.5        | 3.0  | 1.1        | 5.6        |

### *Isomerases*

| Set | FIND |            |            | GREP |            |            |
|-----|------|------------|------------|------|------------|------------|
|     | Both | Intra-only | Inter-only | Both | Intra-only | Inter-only |

|        |     |     |     |     |     |     |
|--------|-----|-----|-----|-----|-----|-----|
| Set 1  | 0.0 | 0.2 | 2.0 | 0.0 | 0.3 | 1.5 |
| Set 2  | 0.0 | 0.5 | 2.7 | 0.0 | 0.6 | 1.8 |
| Set 3  | 0.0 | 0.5 | 1.9 | 0.0 | 0.5 | 3.3 |
| Set 4  | 0.0 | 0.3 | 2.0 | 0.0 | 0.4 | 1.5 |
| Set 5  | 0.0 | 0.1 | 0.0 | 0.0 | 0.1 | 1.5 |
| Set 6  | 0.0 | 0.2 | 5.1 | 0.0 | 0.4 | 3.2 |
| Set 7  | 0.0 | 0.2 | 0.0 | 0.0 | 0.4 | 0.0 |
| Set 8  | 0.0 | 0.3 | 2.0 | 0.0 | 0.4 | 1.3 |
| Set 9  | 0.0 | 0.4 | 0.0 | 0.0 | 0.4 | 1.8 |
| Set 10 | 0.0 | 0.2 | 7.1 | 0.0 | 0.4 | 5.1 |
| Set 11 | 0.0 | 0.3 | 5.4 | 0.0 | 0.4 | 4.2 |
| Set 12 | 0.0 | 0.3 | 1.9 | 0.0 | 0.3 | 2.9 |
| Set 13 | 0.0 | 0.6 | 2.3 | 0.0 | 0.6 | 3.0 |
| Set 14 | 0.0 | 0.6 | 2.2 | 0.0 | 0.7 | 2.8 |

### *Ligases*

| Set    | FIND |            |            | GREP |            |            |
|--------|------|------------|------------|------|------------|------------|
|        | Both | Intra-only | Inter-only | Both | Intra-only | Inter-only |
| Set 1  | 0.0  | 0.2        | 2.0        | 0.0  | 0.3        | 3.0        |
| Set 2  | 0.0  | 0.5        | 0.0        | 0.0  | 0.6        | 3.5        |
| Set 3  | 0.0  | 0.5        | 5.8        | 0.7  | 1.0        | 6.7        |
| Set 4  | 0.0  | 0.2        | 6.0        | 0.0  | 0.4        | 7.7        |
| Set 5  | 0.0  | 0.2        | 2.2        | 0.0  | 0.4        | 3.0        |
| Set 6  | 0.9  | 0.2        | 0.0        | 1.7  | 0.2        | 6.3        |
| Set 7  | 0.0  | 0.4        | 1.9        | 0.0  | 0.6        | 4.6        |
| Set 8  | 0.0  | 0.3        | 2.0        | 0.0  | 0.4        | 2.7        |
| Set 9  | 0.0  | 0.3        | 2.2        | 0.0  | 0.5        | 1.8        |
| Set 10 | 0.0  | 0.3        | 4.8        | 0.0  | 0.5        | 5.1        |
| Set 11 | 0.0  | 0.1        | 0.0        | 0.0  | 0.4        | 1.4        |
| Set 12 | 0.0  | 0.0        | 0.0        | 0.0  | 0.2        | 1.4        |
| Set 13 | 0.0  | 0.2        | 2.3        | 0.0  | 0.4        | 1.5        |
| Set 14 | 0.0  | 0.2        | 0.0        | 0.0  | 0.2        | 0.0        |

### *Translocases*

| Set    | FIND |            |            | GREP |            |            |
|--------|------|------------|------------|------|------------|------------|
|        | Both | Intra-only | Inter-only | Both | Intra-only | Inter-only |
| Set 1  | 0.0  | 0.1        | 0.0        | 0.0  | 0.1        | 0.0        |
| Set 2  | 0.0  | 0.2        | 0.0        | 0.0  | 0.1        | 0.0        |
| Set 3  | 0.0  | 0.0        | 0.0        | 0.0  | 0.0        | 0.0        |
| Set 4  | 0.0  | 0.0        | 0.0        | 0.0  | 0.0        | 0.0        |
| Set 5  | 0.0  | 0.0        | 0.0        | 0.0  | 0.0        | 0.0        |
| Set 6  | 0.0  | 0.0        | 0.0        | 0.0  | 0.0        | 0.0        |
| Set 7  | 0.0  | 0.0        | 0.0        | 0.0  | 0.0        | 0.0        |
| Set 8  | 0.0  | 0.0        | 0.0        | 0.0  | 0.0        | 0.0        |
| Set 9  | 0.0  | 0.0        | 0.0        | 0.0  | 0.0        | 0.0        |
| Set 10 | 0.0  | 0.0        | 0.0        | 0.0  | 0.0        | 0.0        |
| Set 11 | 0.0  | 0.1        | 0.0        | 0.0  | 0.1        | 0.0        |
| Set 12 | 0.0  | 0.0        | 0.0        | 0.0  | 0.0        | 0.0        |
| Set 13 | 0.0  | 0.0        | 0.0        | 0.0  | 0.0        | 0.0        |
| Set 14 | 0.0  | 0.0        | 0.0        | 0.0  | 0.0        | 0.0        |

**Table S7.** Frequency of the seven types of enzymes in the Protein Data Bank (data taken on March the 7th, 2022).

| <i>Enzyme</i>   | <i>Counts</i> | <i>Percentages</i> |
|-----------------|---------------|--------------------|
| Hydrolases      | 40,914        | 37.2%              |
| Transferases    | 35,252        | 32.0%              |
| Oxidoreductases | 16,895        | 15.4%              |
| Lyases          | 8147          | 7.4%               |
| Isomerases      | 4053          | 3.7%               |
| Ligases         | 3403          | 3.1%               |
| Translocases    | 1359          | 1.2%               |

**Table S8.** Percentages of observations, in each subset of the Protein Data Bank, of the a, b, c and d classes of Scop, in proteins with intramolecular disulfide bonds identified with the FIND and the GREP methods.

|        | FIND |      |      |      | GREP |      |      |      |
|--------|------|------|------|------|------|------|------|------|
|        | a    | b    | c    | d    | a    | b    | c    | d    |
| Set 1  | 9.1  | 52.1 | 13.1 | 25.6 | 10.7 | 51.2 | 13.5 | 24.6 |
| Set 2  | 14.0 | 51.0 | 14.3 | 20.7 | 13.6 | 51.2 | 14.8 | 20.4 |
| Set 3  | 11.6 | 49.4 | 15.7 | 23.3 | 10.9 | 50.0 | 16.0 | 23.1 |
| Set 4  | 10.4 | 48.2 | 16.1 | 25.4 | 9.9  | 49.6 | 16.3 | 24.2 |
| Set 5  | 9.5  | 50.2 | 16.2 | 24.1 | 9.5  | 50.5 | 16.7 | 23.3 |
| Set 6  | 11.8 | 50.3 | 16.6 | 21.3 | 11.4 | 49.3 | 17.2 | 22.1 |
| Set 7  | 12.3 | 45.6 | 19.4 | 22.7 | 12.2 | 45.9 | 19.4 | 22.5 |
| Set 8  | 11.2 | 49.8 | 15.1 | 24.0 | 11.0 | 50.1 | 15.1 | 23.9 |
| Set 9  | 8.1  | 49.3 | 17.4 | 25.2 | 8.4  | 49.2 | 17.5 | 24.9 |
| Set 10 | 9.5  | 54.9 | 14.1 | 21.6 | 10.2 | 54.1 | 14.4 | 21.4 |
| Set 11 | 9.2  | 52.3 | 15.7 | 22.8 | 9.2  | 51.9 | 16.3 | 22.5 |
| Set 12 | 13.1 | 50.5 | 15.6 | 20.8 | 12.8 | 50.1 | 16.0 | 21.2 |
| Set 13 | 14.4 | 50.6 | 16.3 | 18.7 | 14.4 | 51.0 | 16.2 | 18.4 |
| Set 14 | 11.5 | 49.6 | 17.8 | 21.1 | 11.3 | 49.8 | 18.2 | 20.8 |

**Table S9.** Percentages, for each subset of the Protein Data Bank, with which a fold of class a–d is connected to a fold of class a–d by an intermolecular disulfide bond, identified with the FIND and GREP methods. Classes are taken from the Scop database.

| Set 1 |      |      |      |      |       |      |      |      |      |
|-------|------|------|------|------|-------|------|------|------|------|
| class | FIND |      |      |      | class | GREP |      |      |      |
|       | a    | b    | c    | d    |       | a    | b    | c    | d    |
| a     | 22.8 | 0.0  | 0.0  | 0.0  | a     | 19.8 | 0.0  | 0.0  | 0.0  |
| b     | 0.0  | 44.3 | 0.0  | 0.0  | b     | 0.0  | 35.1 | 0.9  | 0.0  |
| c     | 0.0  | 0.0  | 12.7 | 0.0  | c     | 0.0  | 0.9  | 13.5 | 0.0  |
| d     | 0.0  | 0.0  | 0.0  | 20.3 | d     | 0.0  | 0.0  | 0.0  | 29.7 |
| Set 2 |      |      |      |      |       |      |      |      |      |
| class | FIND |      |      |      | class | GREP |      |      |      |
|       | a    | b    | c    | d    |       | a    | b    | c    | d    |
| a     | 20.3 | 0.0  | 0.0  | 0.0  | a     | 16.9 | 0.0  | 0.0  | 1.2  |
| b     | 0.0  | 40.6 | 0.0  | 1.6  | b     | 0.0  | 33.7 | 0.0  | 1.2  |
| c     | 0.0  | 0.0  | 14.1 | 0.0  | c     | 0.0  | 0.0  | 15.7 | 0.0  |
| d     | 0.0  | 1.6  | 0.0  | 21.9 | d     | 1.2  | 1.2  | 0.0  | 28.9 |
| Set 3 |      |      |      |      |       |      |      |      |      |
| class | FIND |      |      |      | class | GREP |      |      |      |
|       | a    | b    | c    | d    |       | a    | b    | c    | d    |
| a     | 16.8 | 0.0  | 0.0  | 0.0  | a     | 15.7 | 0.0  | 0.0  | 0.0  |
| b     | 0.0  | 32.7 | 0.0  | 2.0  | b     | 0.0  | 29.1 | 0.0  | 1.6  |
| c     | 0.0  | 0.0  | 16.8 | 0.0  | c     | 0.0  | 0.0  | 15.7 | 0.0  |
| d     | 0.0  | 2.0  | 0.0  | 29.7 | d     | 0.0  | 1.6  | 0.0  | 36.2 |
| Set 4 |      |      |      |      |       |      |      |      |      |
| class | FIND |      |      |      | class | GREP |      |      |      |
|       | a    | b    | c    | d    |       | a    | b    | c    | d    |
| a     | 7.4  | 0.0  | 0.0  | 0.0  | a     | 7.2  | 0.0  | 0.0  | 0.0  |
| b     | 0.0  | 44.1 | 0.0  | 1.5  | b     | 0.0  | 38.6 | 0.0  | 1.2  |
| c     | 0.0  | 0.0  | 20.6 | 2.9  | c     | 0.0  | 0.0  | 20.5 | 2.4  |
| d     | 0.0  | 1.5  | 2.9  | 19.1 | d     | 0.0  | 1.2  | 2.4  | 26.5 |
| Set 5 |      |      |      |      |       |      |      |      |      |
| class | FIND |      |      |      | class | GREP |      |      |      |
|       | a    | b    | c    | d    |       | a    | b    | c    | d    |
| a     | 13.6 | 0.0  | 0.0  | 0.0  | a     | 10.5 | 0.0  | 0.0  | 0.0  |
| b     | 0.0  | 47.5 | 0.0  | 1.7  | b     | 0.0  | 38.2 | 0.0  | 1.3  |
| c     | 0.0  | 0.0  | 22.0 | 0.0  | c     | 0.0  | 0.0  | 25.0 | 0.0  |
| d     | 0.0  | 1.7  | 0.0  | 13.6 | d     | 0.0  | 1.3  | 0.0  | 23.7 |
| Set 6 |      |      |      |      |       |      |      |      |      |
| class | FIND |      |      |      | class | GREP |      |      |      |
|       | a    | b    | c    | d    |       | a    | b    | c    | d    |
| a     | 5.7  | 0.0  | 0.0  | 0.0  | a     | 6.7  | 0.0  | 0.0  | 0.0  |
| b     | 0.0  | 41.4 | 0.0  | 4.3  | b     | 0.0  | 36.5 | 0.0  | 3.8  |
| c     | 0.0  | 0.0  | 18.6 | 0.0  | c     | 0.0  | 0.0  | 20.2 | 0.0  |
| d     | 0.0  | 4.3  | 0.0  | 25.7 | d     | 0.0  | 3.8  | 0.0  | 28.8 |
| Set 7 |      |      |      |      |       |      |      |      |      |
| class | FIND |      |      |      | class | GREP |      |      |      |
|       | a    | b    | c    | d    |       | a    | b    | c    | d    |
| a     | 14.1 | 0.0  | 0.0  | 0.0  | a     | 12.1 | 0.0  | 0.0  | 0.0  |

| b      | 0.0  | 39.4 | 0.0  | 4.0  | b     | 0.0  | 37.1 | 0.0  | 3.4  |
|--------|------|------|------|------|-------|------|------|------|------|
| c      | 0.0  | 0.0  | 12.1 | 0.0  | c     | 0.0  | 0.0  | 16.4 | 0.0  |
| d      | 0.0  | 4.0  | 0.0  | 26.3 | d     | 0.0  | 3.4  | 0.0  | 27.6 |
| Set 8  |      |      |      |      |       |      |      |      |      |
| class  | FIND |      |      |      | class | GREP |      |      |      |
|        | a    | b    | c    | d    |       | a    | b    | c    | d    |
| a      | 9.6  | 0.0  | 0.0  | 0.0  | a     | 12.4 | 0.0  | 0.0  | 0.0  |
| b      | 0.0  | 42.2 | 1.2  | 0.0  | b     | 0.0  | 35.2 | 1.0  | 0.0  |
| c      | 0.0  | 1.2  | 20.5 | 0.0  | c     | 0.0  | 1.0  | 22.9 | 0.0  |
| d      | 0.0  | 0.0  | 0.0  | 25.3 | d     | 0.0  | 0.0  | 0.0  | 27.6 |
| Set 9  |      |      |      |      |       |      |      |      |      |
| class  | FIND |      |      |      | class | GREP |      |      |      |
|        | a    | b    | c    | d    |       | a    | b    | c    | d    |
| a      | 8.7  | 0.0  | 0.0  | 0.0  | a     | 8.6  | 0.0  | 0.0  | 0.0  |
| b      | 0.0  | 69.6 | 0.0  | 0.0  | b     | 0.0  | 60.2 | 0.0  | 0.0  |
| c      | 0.0  | 0.0  | 7.2  | 0.0  | c     | 0.0  | 0.0  | 9.7  | 0.0  |
| d      | 0.0  | 0.0  | 0.0  | 14.5 | d     | 0.0  | 0.0  | 0.0  | 21.5 |
| Set 10 |      |      |      |      |       |      |      |      |      |
| class  | FIND |      |      |      | class | GREP |      |      |      |
|        | a    | b    | c    | d    |       | a    | b    | c    | d    |
| a      | 18.9 | 0.0  | 0.0  | 1.4  | a     | 19.1 | 0.9  | 0.0  | 0.9  |
| b      | 0.0  | 36.5 | 0.0  | 1.4  | b     | 0.9  | 30.9 | 0.0  | 0.9  |
| c      | 0.0  | 0.0  | 24.3 | 0.0  | c     | 0.0  | 0.0  | 26.4 | 0.0  |
| d      | 1.4  | 1.4  | 0.0  | 14.9 | d     | 0.9  | 0.9  | 0.0  | 18.2 |
| Set 11 |      |      |      |      |       |      |      |      |      |
| class  | FIND |      |      |      | class | GREP |      |      |      |
|        | a    | b    | c    | d    |       | a    | b    | c    | d    |
| a      | 4.5  | 0.0  | 1.5  | 0.0  | a     | 7.8  | 0.0  | 1.1  | 0.0  |
| b      | 0.0  | 59.1 | 0.0  | 0.0  | b     | 0.0  | 47.8 | 0.0  | 0.0  |
| c      | 1.5  | 0.0  | 12.1 | 0.0  | c     | 1.1  | 0.0  | 16.7 | 0.0  |
| d      | 0.0  | 0.0  | 0.0  | 21.2 | d     | 0.0  | 0.0  | 0.0  | 25.6 |
| Set 12 |      |      |      |      |       |      |      |      |      |
| class  | FIND |      |      |      | class | GREP |      |      |      |
|        | a    | b    | c    | d    |       | a    | b    | c    | d    |
| a      | 6.1  | 0.0  | 1.5  | 0.0  | a     | 4.7  | 0.0  | 1.2  | 0.0  |
| b      | 0.0  | 47.0 | 0.0  | 1.5  | b     | 0.0  | 42.4 | 0.0  | 3.5  |
| c      | 1.5  | 0.0  | 24.2 | 0.0  | c     | 1.2  | 0.0  | 25.9 | 0.0  |
| d      | 0.0  | 1.5  | 0.0  | 16.7 | d     | 0.0  | 3.5  | 0.0  | 17.6 |
| Set 13 |      |      |      |      |       |      |      |      |      |
| class  | FIND |      |      |      | class | GREP |      |      |      |
|        | a    | b    | c    | d    |       | a    | b    | c    | d    |
| a      | 16.9 | 0.0  | 1.4  | 0.0  | a     | 15.1 | 0.0  | 1.1  | 0.0  |
| b      | 0.0  | 42.3 | 0.0  | 0.0  | b     | 0.0  | 41.9 | 0.0  | 0.0  |
| c      | 1.4  | 0.0  | 15.5 | 0.0  | c     | 1.1  | 0.0  | 17.2 | 0.0  |
| d      | 0.0  | 0.0  | 0.0  | 22.5 | d     | 0.0  | 0.0  | 0.0  | 23.7 |
| Set 14 |      |      |      |      |       |      |      |      |      |
| class  | FIND |      |      |      | class | GREP |      |      |      |
|        | a    | b    | c    | d    |       | a    | b    | c    | d    |
| a      | 18.5 | 0.0  | 1.2  | 0.0  | a     | 15.5 | 0.0  | 0.9  | 0.0  |
| b      | 0.0  | 46.9 | 0.0  | 1.2  | b     | 0.0  | 39.1 | 0.0  | 0.9  |

|   |     |     |      |      |   |     |     |      |      |
|---|-----|-----|------|------|---|-----|-----|------|------|
| c | 1.2 | 0.0 | 11.1 | 0.0  | c | 0.9 | 0.0 | 16.4 | 0.0  |
| d | 0.0 | 1.2 | 0.0  | 18.5 | d | 0.0 | 0.9 | 0.0  | 25.5 |

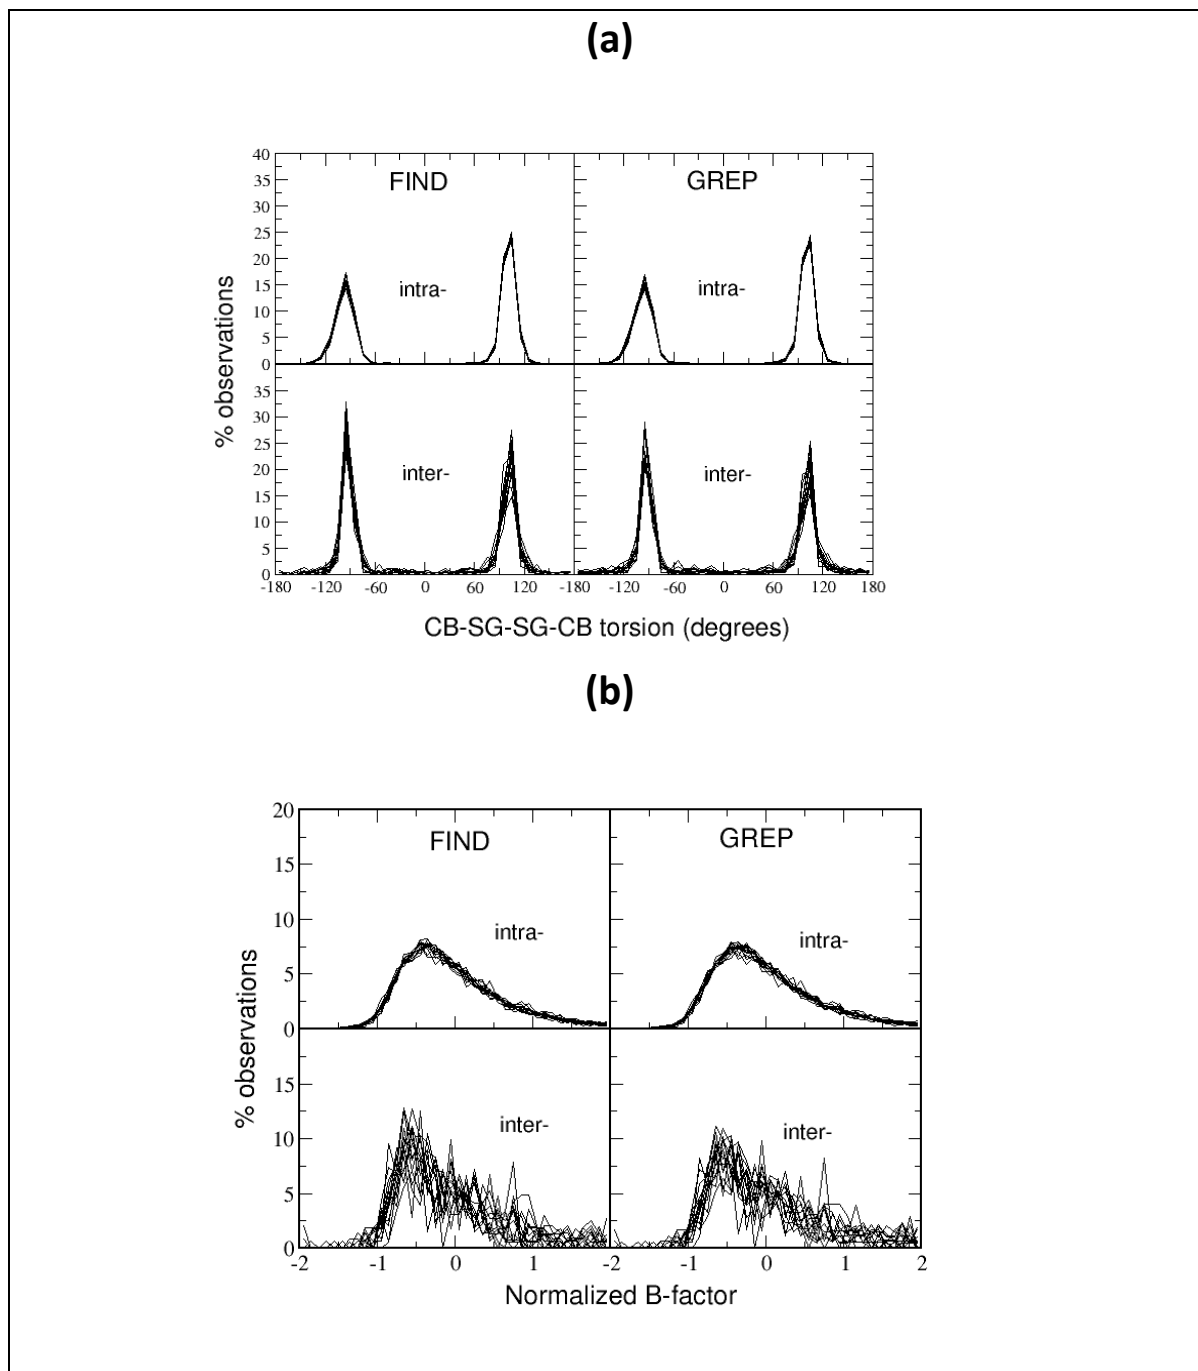

**Figure S1.** (a) Distribution, for each subset of the Protein Data Bank, of the torsions defined by the CB-SG-SG-CB atoms of the sidechains of the cysteines that form the intra- or intermolecular DBs, identified with the FIND or GREP method; (b) distribution, for each subset of the Protein Data Bank, of the normalized B-factors of the sulfur atoms of the cysteines that form the intra- or intermolecular DBs, identified with the FIND or GREP method.
